# Supplementary material for: Performance evaluation of non-ionic silicone surfactants OFX 0309 and DC 193C as a new approach in cloud point extraction – spectrophotometry for determination of atrazine in water samples
Source: Royal Society of Chemistry journal article supplement (doi:10.1039/c8ra00868j), 2018-01-01
Supplement: c8ra00868j1.pdf [file c8ra00868j1.pdf]

## List of Supporting Information

**Fig. SI1:** Molecular structure of (a) DC 193C (b) OFX 0309 (c) atrazine.

**Fig. SI2:** Proposed interaction between the surfactants (OFX 0309 and DC 193C) and atrazine.

**Table SI1:** Molecular structure of atrazine in the pH condition.

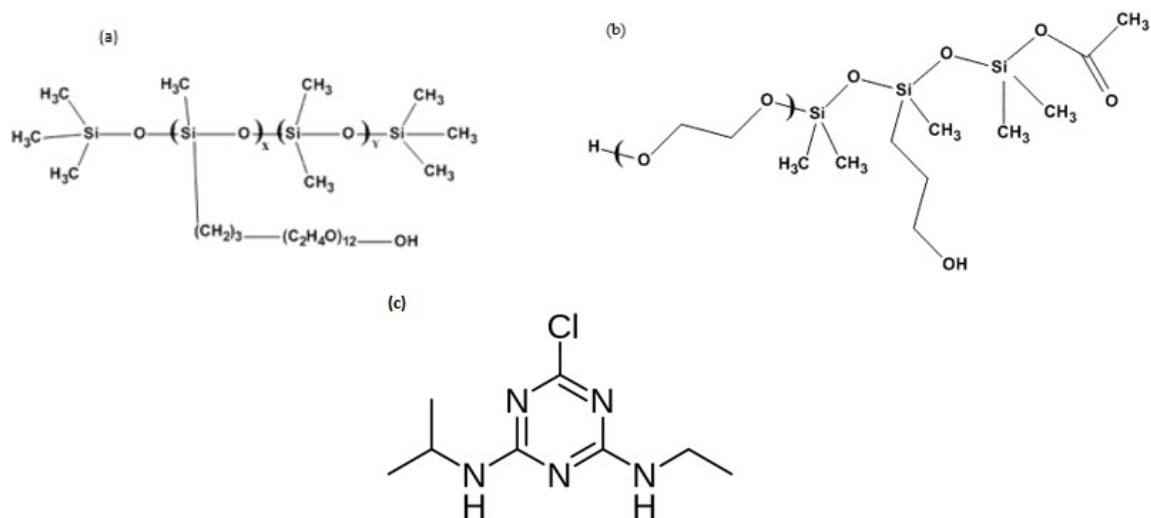

**Fig. SI1:** Molecular structure of (a) DC 193C (b) OFX 0309 (c) atrazine.

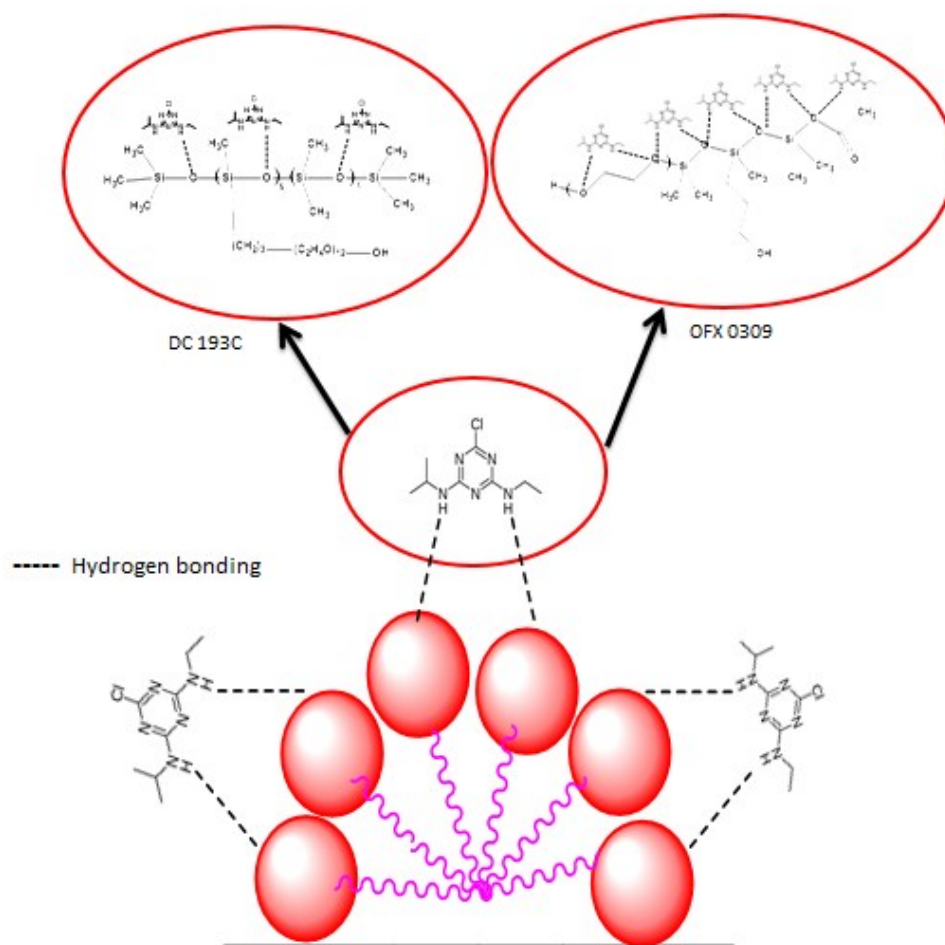

**Fig. SI2:** Proposed interaction between the surfactants (OFX 0309 and DC 193C) and at

**Table S11**

Molecular structure of atrazine in the pH condition.

|          | Protonated                                                                        | Neutral                                                                           | Deprotonated                                                                        |
|----------|-----------------------------------------------------------------------------------|-----------------------------------------------------------------------------------|-------------------------------------------------------------------------------------|
|          | (pH < 5)                                                                          | (pH = 5)                                                                          | (pH > 5)                                                                            |
| Atrazine | 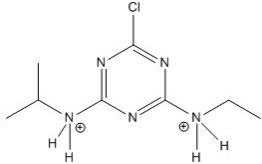 |  |  |
